# Supplementary material for: Haplotypes with Copy Number and Single Nucleotide Polymorphisms in CYP2A6 Locus Are Associated with Smoking Quantity in a Japanese Population
Source: PubMed Central journal article supplement (PMC3458030; doi:10.1371/journal.pone.0044507), 2012-09-25
Supplement: pone.0044507.s012.pdf [file pone.0044507.s012.pdf]

**Table S1.** Characteristics and distributions of the traits in the study population.

| Stage                        | Genotyping platform     | No. subjects | Age (mean $\pm$ SD) | No. female (%) | CPD (mean $\pm$ SD) |
|------------------------------|-------------------------|--------------|---------------------|----------------|---------------------|
| GWAS set*                    | Illumina HumanHap 610K  | 11,696       | 62.8 $\pm$ 11.1     | 2,296 (19.7)   | 24.6 $\pm$ 16.8     |
| Replication set <sup>†</sup> | Illumina OmniExpress II | 5,462        | 55.3 $\pm$ 15.1     | 1,390 (25.3)   | 23.2 $\pm$ 15.3     |

\* Subjects consisted of Japanese patients in 19 disease groups (not mutually exclusive) as follows: Colorectal cancer ( $N=1286$ ), Breast cancer ( $N=335$ ), Prostate cancer ( $N=869$ ), Lung cancer ( $N=997$ ), Gastric cancer ( $N=1,167$ ), Diabetes ( $N=3,169$ ), Atherosclerosis obliterans (ASO) ( $N=721$ ), Arrhythmia ( $N=1,265$ ), Cerebral infarction ( $N=1,180$ ), Myocardial infarction ( $N=1,651$ ), Gallbladder and Bile duct carcinoma ( $N=55$ ), Pancreas cancer ( $N=107$ ), Drug eruption (Drug-induced hypersensitivity syndrome) ( $N=38$ ), Rheumatoid arthritis ( $N=590$ ), Amyotrophic lateral sclerosis (ALS) ( $N=4$ ), Liver cancer (Hepatocellular carcinoma) ( $N=705$ ), Liver cirrhosis ( $N=952$ ), Osteoporosis ( $N=211$ ), Uterine myoma (Myoma uteri) ( $N=409$ )

<sup>†</sup> Subjects consisted of Japanese patients in 16 disease groups (not mutually exclusive) as follows: Diabetes ( $N=511$ ), Bronchial asthma ( $N=241$ ), Basedow's disease ( $N=800$ ), Cerebral infarction ( $N=246$ ), Cerebral aneurysm ( $N=599$ ), Emphysema (Chronic obstructive pulmonary disease; COPD) ( $N=982$ ), Atopic dermatitis ( $N=443$ ), Hyperlipidemia ( $N=583$ ), Arrhythmia ( $N=237$ ), Cataract ( $N=329$ ), Urolithiasis ( $N=650$ ), Glaucoma ( $N=363$ ), Epilepsy ( $N=653$ ), Esophageal cancer ( $N=705$ ), Uterine body cancer ( $N=125$ ), Nephrotic syndrome ( $N=320$ )
