# Supplementary material for: Haplotypes with Copy Number and Single Nucleotide Polymorphisms in CYP2A6 Locus Are Associated with Smoking Quantity in a Japanese Population
Source: PubMed Central journal article supplement (PMC3458030; doi:10.1371/journal.pone.0044507), 2012-09-25
Supplement: pone.0044507.s013.pdf [file pone.0044507.s013.pdf]

**Table S2. Replication study of significant and suggestive genetic loci in GWAS.**

| SNP        | Chr | Position<br>(hg19) | Coded<br>allele | GWAS set      |                       | Replication set |                       | Combined      |                       |
|------------|-----|--------------------|-----------------|---------------|-----------------------|-----------------|-----------------------|---------------|-----------------------|
|            |     |                    |                 | Effect (s.e.) | <i>P</i>              | Effect (s.e.)   | <i>P</i>              | Effect (s.e.) | <i>P</i>              |
| rs8102683  | 19  | 41,363,765         | Copy Number     | 2.68 (0.253)  | $4.3 \times 10^{-26}$ | 2.89 (0.338)    | $1.5 \times 10^{-17}$ | 2.76 (0.203)  | $3.8 \times 10^{-42}$ |
| rs2106595  | 7   | 117,946,785        | G               | 1.2 (0.24)    | $9.5 \times 10^{-7}$  | 0.35 (0.32)     | 0.28                  | 0.88 (0.19)   | $4.9 \times 10^{-6}$  |
| rs12317231 | 12  | 1,580,082          | G               | -2.7 (0.61)   | $9.3 \times 10^{-6}$  | 0.3 (0.73)      | 0.68                  | -1.5 (0.47)   | 0.0016                |
| rs12438196 | 15  | 49,450,054         | T               | -1.5 (0.32)   | $3.9 \times 10^{-6}$  | 0.21 (0.45)     | 0.65                  | -0.91 (0.26)  | $5.0 \times 10^{-4}$  |
| rs4812020  | 20  | 56,597,486         | G               | -1.1 (0.24)   | $6.5 \times 10^{-6}$  | -0.12 (0.28)    | 0.66                  | -0.68 (0.18)  | 0.00021               |
| rs4925446  | 22  | 47,485,894         | T               | 1.2 (0.26)    | $8.1 \times 10^{-6}$  | 0.14 (0.34)     | 0.69                  | 0.79 (0.21)   | 0.00015               |
