# Supplementary material for: Haplotypes with Copy Number and Single Nucleotide Polymorphisms in CYP2A6 Locus Are Associated with Smoking Quantity in a Japanese Population
Source: PubMed Central journal article supplement (PMC3458030; doi:10.1371/journal.pone.0044507), 2012-09-25
Supplement: pone.0044507.s014.pdf [file pone.0044507.s014.pdf]

**Table S3.** Haplotype frequency for five CNP markers.

| Haplotype |            |            |           |           | Freq. (%)             |
|-----------|------------|------------|-----------|-----------|-----------------------|
| rs8192723 | rs10418304 | rs10422346 | rs8102683 | rs8105704 |                       |
| 1         | 1          | 1          | 1         | 1         | 78.0                  |
| 0         | 0          | 0          | 0         | 0         | 18.0                  |
| 1         | 1          | 0          | 1         | 1         | 0.56                  |
| 1         | 0          | 0          | 0         | 0         | 0.56                  |
| 0         | 1          | 1          | 1         | 1         | 0.51                  |
| 0         | 1          | 0          | 0         | 0         | 0.37                  |
| 1         | 1          | 2          | 1         | 1         | 0.33                  |
| 1         | 0          | 1          | 1         | 1         | 0.29                  |
| 0         | 0          | 1          | 0         | 0         | 0.24                  |
| 1         | 1          | 1          | 2         | 1         | 0.23                  |
| 1         | 1          | 0          | 0         | 0         | 0.17                  |
| 0         | 0          | 0          | 0         | 1         | 0.15                  |
| 1         | 1          | 1          | 0         | 1         | 0.15                  |
| 1         | 1          | 1          | 2         | 2         | 0.13                  |
| 1         | 1          | 1          | 1         | 0         | 0.091                 |
| 1         | 1          | 1          | 1         | 2         | 0.079                 |
| 1         | 1          | 2          | 2         | 2         | 0.056                 |
| 1         | 1          | 2          | 2         | 1         | 0.026                 |
| 0         | 1          | 2          | 1         | 1         | 0.024                 |
| 1         | 0          | 1          | 0         | 0         | 0.021                 |
| 0         | 1          | 0          | 1         | 1         | 0.019                 |
| 0         | 1          | 0          | 0         | 1         | 0.017                 |
| 1         | 0          | 0          | 0         | 1         | 0.013                 |
| 1         | 0          | 1          | 1         | 2         | 0.0086                |
| 1         | 1          | 2          | 1         | 2         | 0.0082                |
| 1         | 1          | 0          | 1         | 2         | 0.008                 |
| 0         | 1          | 1          | 0         | 0         | 0.0078                |
| 1         | 0          | 1          | 2         | 1         | 0.0077                |
| 1         | 1          | 0          | 0         | 1         | 0.0075                |
| 0         | 0          | 1          | 1         | 1         | 0.0049                |
| 1         | 1          | 2          | 1         | 0         | 0.0039                |
| 1         | 0          | 1          | 1         | 0         | 0.0039                |
| 1         | 1          | 1          | 0         | 0         | 0.0038                |
| 1         | 0          | 0          | 1         | 0         | 0.0035                |
| 0         | 1          | 1          | 0         | 1         | 0.0033                |
| 1         | 1          | 0          | 2         | 1         | 0.0027                |
| 1         | 0          | 0          | 1         | 1         | 0.002                 |
| 1         | 2          | 0          | 2         | 2         | $1.0 \times 10^{-23}$ |
| 1         | 0          | 1          | 0         | 2         | $5.5 \times 10^{-50}$ |

Haplotype frequencies among the five CNPs (rs8192723, rs10418304, rs10422346, rs8102683, rs8105704) were estimated by a standard EM algorithm with the maximum a posteriori copy number dosages obtained by PlatinumCNV.
