# Supplementary material for: Haplotypes with Copy Number and Single Nucleotide Polymorphisms in CYP2A6 Locus Are Associated with Smoking Quantity in a Japanese Population
Source: PubMed Central journal article supplement (PMC3458030; doi:10.1371/journal.pone.0044507), 2012-09-25
Supplement: pone.0044507.s015.pdf [file pone.0044507.s015.pdf]

**Table S4.** Results of TaqMan validation for GWAS and replication set.

|                                      | Concordance rate at each CNP locus (%) |                             |                             |                            |                            |
|--------------------------------------|----------------------------------------|-----------------------------|-----------------------------|----------------------------|----------------------------|
|                                      | rs8192723<br>(41,356,054*)             | rs10418304<br>(41,356,751*) | rs10422346<br>(41,362,173*) | rs8102683<br>(41,363,765*) | rs8105704<br>(41,363,898*) |
| GWAS set <sup>†</sup> (N=445)        | 96.6                                   | 98.9                        | 98.2                        | 99.6                       | 99.3                       |
| Replication set <sup>‡</sup> (N=759) | 96.7                                   | 97.8                        | 97.4                        | 99.2                       | 98.8                       |

We calculated the concordance rates by comparing the result of PlatinumCNV (maximum a posteriori copy number dosages) and the TaqMan validation result.

\* NCBI Build. 37; hg19.

<sup>†</sup> qPCR assay position: 41,355,978-41,356,078 (Build 37; hg19)

<sup>‡</sup> qPCR assay position: 41,363,935-41,364,006 (Build 37; hg19)
