# Supplementary material for: Haplotypes with Copy Number and Single Nucleotide Polymorphisms in CYP2A6 Locus Are Associated with Smoking Quantity in a Japanese Population
Source: PubMed Central journal article supplement (PMC3458030; doi:10.1371/journal.pone.0044507), 2012-09-25
Supplement: pone.0044507.s016.pdf [file pone.0044507.s016.pdf]

**Table S5. Haplotype frequencies of CYP2A6 functional allele and rs11878604.**

| Possible<br>CYP2A6 alleles <sup>†</sup> | rs11878604 |       |          | <i>p</i> <sup>‡</sup> |
|-----------------------------------------|------------|-------|----------|-----------------------|
|                                         | T          | C     | Total(%) |                       |
| *1, *2 and other functional alleles     | 35.96      | 3.37  | 39.33    | <i>reference</i>      |
| *4 (whole deletion)                     | 19.10      | 2.25  | 21.35    | 0.74                  |
| *7, *36, *37 (missense SNP in Exon 9)   | 0.00       | 14.61 | 14.61    | $4.4 \times 10^{-18}$ |
| *9, *15 (SNP in TATA box)               | 1.69       | 19.66 | 21.35    | $1.0 \times 10^{-18}$ |
| *10 (two missense SNPs in Exon 9)       | 0.00       | 2.25  | 2.25     | $1.8 \times 10^{-4}$  |
| *13                                     | 0.00       | 0.56  | 0.56     | 0.099                 |
| *18                                     | 0.00       | 0.56  | 0.56     | 0.099                 |
| Total(%)                                | 56.75      | 43.25 | 100.0    |                       |

The phased reference panel data of 1000 Genomes project (phase I; 2011-11-23).

Only the Japanese subjects were used (JPT;  $N = 89$ ).

<sup>†</sup> The CYP2A6 functional alleles were determined by the seven nonsense SNPs of CYP2A6 gene; rs28399468, rs5031017 (rs75344699), rs5031016 (rs60711313), rs61736436, rs1809810, rs28399434 and rs28399433. These SNP genotypes were phased during the imputation study using the Beagle software [33]. The known CYP2A6 functional alleles (<http://cypalleles.ki.se/>) were assigned according to the combination of alleles in the phased haplotypes.

<sup>‡</sup> Significance of association between each functional allele and the mutant allele at rs11878604 was assessed by the Fisher's exact test.
