# Supplementary material for: Haplotypes with Copy Number and Single Nucleotide Polymorphisms in CYP2A6 Locus Are Associated with Smoking Quantity in a Japanese Population
Source: PubMed Central journal article supplement (PMC3458030; doi:10.1371/journal.pone.0044507), 2012-09-25
Supplement: pone.0044507.s017.pdf [file pone.0044507.s017.pdf]

**Table S6. Results of the GWAS and the replication study for loci previously studied with European populations.**

| SNP        | Chr | Position<br>(hg19) | Coded<br>allele | GWAS set     |               |                      | Replication set |               |                      | Combined     |               |                      | Ref. <sup>†</sup> |
|------------|-----|--------------------|-----------------|--------------|---------------|----------------------|-----------------|---------------|----------------------|--------------|---------------|----------------------|-------------------|
|            |     |                    |                 | Allele freq. | Effect (s.e.) | P                    | Allele freq.    | Effect (s.e.) | P                    | Allele freq. | Effect (s.e.) | P                    |                   |
| rs215605   | 7   | 32,336,965         | T               | 0.31         | -0.23 (0.22)  | 0.29                 | 0.31            | 0.057 (0.29)  | 0.85                 | 0.31         | -0.13 (0.18)  | 0.47                 | [4]               |
| rs215614   | 7   | 32,347,335         | G               | 0.66         | 0.13 (0.22)   | 0.54                 | 0.67            | 0.097 (0.29)  | 0.74                 | 0.66         | 0.12 (0.17)   | 0.49                 | [4]               |
| rs6474412  | 8   | 42,550,498         | T               | 0.85         | 0.60 (0.30)   | 0.042                | 0.86            | 0.26 (0.4)    | 0.51                 | 0.85         | 0.48 (0.24)   | 0.043                | [4]               |
| rs13280604 | 8   | 42,559,586         | G               | 0.14         | -0.56 (0.31)  | 0.073                | 0.13            | -0.27 (0.4)   | 0.49                 | 0.14         | -0.45 (0.25)  | 0.066                | [4]               |
| rs1329650  | 10  | 93,348,120         | T               | 0.76         | 0.07 (0.24)   | 0.77                 | 0.76            | -0.65 (0.32)  | 0.042                | 0.76         | -0.20 (0.19)  | 0.31                 | [6]               |
| rs1028936  | 10  | 93,349,797         | C               | 0.62         | -0.29 (0.22)  | 0.19                 | 0.61            | -0.18 (0.28)  | 0.51                 | 0.61         | -0.25 (0.17)  | 0.15                 | [6]               |
| rs588765   | 15  | 78,865,425         | T               | 0.12         | -0.097 (0.32) | 0.76                 | 0.11            | 0.019 (0.42)  | 0.96                 | 0.12         | -0.055 (0.25) | 0.83                 | [5]               |
| rs16969968 | 15  | 78,882,925         | G               | 0.98         | -0.56 (0.71)  | 0.43                 | 0.98            | -1.50 (0.86)  | 0.088                | 0.98         | -0.93 (0.55)  | 0.091                | [5,6]             |
| rs1051730  | 15  | 78,894,339         | G               | 0.98         | -0.56 (0.71)  | 0.43                 | 0.98            | -1.50 (0.86)  | 0.088                | 0.98         | -0.93 (0.55)  | 0.090                | [4-6]             |
| rs6495308  | 15  | 78,907,656         | T               | 0.22         | 0.058 (0.25)  | 0.81                 | 0.22            | 0.69 (0.32)   | 0.031                | 0.22         | 0.29 (0.20)   | 0.13                 | [5]               |
| rs7937     | 19  | 41,302,706         | T               | 0.64         | 0.19 (0.21)   | 0.37                 | 0.64            | 0.13 (0.28)   | 0.65                 | 0.64         | 0.17 (0.17)   | 0.32                 | [4]               |
| rs3733829  | 19  | 41,310,571         | G               | 0.39         | 0.72 (0.21)   | 0.00065              | 0.39            | 0.66 (0.28)   | 0.018                | 0.39         | 0.7 (0.17)    | $3.3 \times 10^{-5}$ | [6]               |
| rs1801272  | 19  | 41,354,533         | T               | 0.012        | -11 (2.40)    | $1.4 \times 10^{-5}$ | 0.012           | -6.5 (3.70)   | 0.082                | 0.012        | -9.4 (2.0)    | $4.5 \times 10^{-6}$ | [4]               |
| rs7260329  | 19  | 41,521,638         | G               | 0.56         | 0.30 (0.21)   | 0.15                 | 0.56            | 1.1 (0.27)    | $9.4 \times 10^{-5}$ | 0.56         | 0.59 (0.17)   | 0.00041              | [4]               |
| rs4105144  | 19  | 41,358,624         | -               | -            | -             | -                    | -               | -             | -                    | -            | -             | -                    | [4]               |

<sup>†</sup> previous reports provided in the main text.
