# Supplementary material for: Haplotypes with Copy Number and Single Nucleotide Polymorphisms in CYP2A6 Locus Are Associated with Smoking Quantity in a Japanese Population
Source: PubMed Central journal article supplement (PMC3458030; doi:10.1371/journal.pone.0044507), 2012-09-25
Supplement: pone.0044507.s018.pdf [file pone.0044507.s018.pdf]

**Table S7. Reference genotype replacement rule in a common deletion region.**

| Copy<br>Number |   | Original data |    |    |
|----------------|---|---------------|----|----|
|                |   | AA            | AB | BB |
| 0              | → | OO            | OO | OO |
| 1              | → | AO            | ?? | BO |
| 2              | → | BB            | AB | BB |

We assume there exist two normal alleles "A" and "B" along with the deletion allele "O" at the SNP locus within a copy number deletion region. Missing allele is indicated by "?".
